# Supplementary material for: Drying Behavior and Kinetics of Drying Process of Plant-Based Enteric Hard Capsules
Source: PubMed Central journal article supplement (PMC7998449; doi:10.3390/pharmaceutics13030335), 2021-03-05
Supplement: pharmaceutics-13-00335-s001.pdf [file pharmaceutics-13-00335-s001.pdf]

# Supplementary Materials: Drying Behavior and Kinetics of Drying Process of Plant-Based Enteric Hard Capsules

Chuqi H, Haodong Wang, Yucheng Yang, Yayan Huang, Xueqin Zhang, Moses Arowo, Jing Ye, Na Zhang and Meitian Xiao

**Table S1.** Results of statistical analysis of the mathematical models at different drying temperature.

| RH % | T °C | Model        |                |                |                              |                |                             |                              |                |                |                                                                                                                                                                                                                                                   |                |                             |                                                                                                                                                                                                                                                                            |                |                             |    |              |        |        |                              |        |                             |                              |        |        |        |                             |        |                             |    |              |        |        |                              |        |                             |                              |        |        |        |        |                             |    |              |        |        |                              |        |                             |                              |        |        |        |        |                             |
|------|------|--------------|----------------|----------------|------------------------------|----------------|-----------------------------|------------------------------|----------------|----------------|---------------------------------------------------------------------------------------------------------------------------------------------------------------------------------------------------------------------------------------------------|----------------|-----------------------------|----------------------------------------------------------------------------------------------------------------------------------------------------------------------------------------------------------------------------------------------------------------------------|----------------|-----------------------------|----|--------------|--------|--------|------------------------------|--------|-----------------------------|------------------------------|--------|--------|--------|-----------------------------|--------|-----------------------------|----|--------------|--------|--------|------------------------------|--------|-----------------------------|------------------------------|--------|--------|--------|--------|-----------------------------|----|--------------|--------|--------|------------------------------|--------|-----------------------------|------------------------------|--------|--------|--------|--------|-----------------------------|
|      |      | Lewis        |                |                | Page                         |                |                             | Henderson and Pabis          |                |                | Logarithmic                                                                                                                                                                                                                                       |                |                             | Wang and singh                                                                                                                                                                                                                                                             |                |                             |    |              |        |        |                              |        |                             |                              |        |        |        |                             |        |                             |    |              |        |        |                              |        |                             |                              |        |        |        |        |                             |    |              |        |        |                              |        |                             |                              |        |        |        |        |                             |
|      |      | parameters   | R <sup>2</sup> | χ <sup>2</sup> | parameters                   | R <sup>2</sup> | χ <sup>2</sup>              | parameters                   | R <sup>2</sup> | χ <sup>2</sup> | parameters                                                                                                                                                                                                                                        | R <sup>2</sup> | χ <sup>2</sup>              | parameters                                                                                                                                                                                                                                                                 | R <sup>2</sup> | χ <sup>2</sup>              |    |              |        |        |                              |        |                             |                              |        |        |        |                             |        |                             |    |              |        |        |                              |        |                             |                              |        |        |        |        |                             |    |              |        |        |                              |        |                             |                              |        |        |        |        |                             |
| 60   | 25   | k=0.023<br>0 | 0.9688         | 0.0036         | k=0.005<br>0<br>n=1.387<br>6 | 0.9940         | 6.9495<br>×10 <sup>-4</sup> | a=1.065<br>0<br>k=0.024<br>4 | 0.9716         | 0.0033         | a=1.241<br>3<br>k=0.015<br>9<br>c=-<br>0.2199<br>a=1.178<br>2<br>k=0.018<br>9<br>c=-<br>0.1573<br>a=1.132<br>4<br>k=0.024<br>8<br>c=-<br>0.0939<br>a=1.116<br>2<br>k=0.027<br>7<br>c=-<br>0.0796<br>a=1.060<br>1<br>k=0.043<br>0<br>c=-<br>0.0302 | 0.9932         | 7.9250<br>×10 <sup>-4</sup> | a=-<br>0.0166<br>b=6.915<br>6<br>×10 <sup>-5</sup><br>a=-<br>0.0181<br>b=8.219<br>8<br>×10 <sup>-5</sup><br>a=-<br>0.0206<br>b=1.049<br>8<br>×10 <sup>-5</sup><br>a=-<br>0.0219<br>b=1.163<br>6<br>×10 <sup>-5</sup><br>a=-<br>0.0260<br>b=1.547<br>4<br>×10 <sup>-4</sup> | 0.9985         | 1.6949<br>×10 <sup>-4</sup> |    |              |        |        |                              |        |                             |                              |        |        |        |                             |        |                             |    |              |        |        |                              |        |                             |                              |        |        |        |        |                             |    |              |        |        |                              |        |                             |                              |        |        |        |        |                             |
|      |      |              |                |                |                              |                |                             |                              |                |                |                                                                                                                                                                                                                                                   |                |                             |                                                                                                                                                                                                                                                                            |                |                             | 30 | k=0.025<br>3 | 0.9748 | 0.0029 | k=0.006<br>7<br>n=1.342<br>8 | 0.9947 | 6.0882<br>×10 <sup>-4</sup> | a=1.057<br>2<br>k=0.026<br>6 | 0.9767 | 0.0027 | 0.9935 | 7.4369<br>×10 <sup>-4</sup> | 0.9994 | 7.3465<br>×10 <sup>-5</sup> |    |              |        |        |                              |        |                             |                              |        |        |        |        |                             |    |              |        |        |                              |        |                             |                              |        |        |        |        |                             |
|      |      |              |                |                |                              |                |                             |                              |                |                |                                                                                                                                                                                                                                                   |                |                             |                                                                                                                                                                                                                                                                            |                |                             |    |              |        |        |                              |        |                             |                              |        |        |        |                             |        |                             | 35 | k=0.029<br>5 | 0.9756 | 0.0028 | k=0.006<br>9<br>n=1.390<br>8 | 0.9977 | 2.7376<br>×10 <sup>-4</sup> | a=1.063<br>7<br>k=0.031<br>1 | 0.9781 | 0.0026 | 0.9887 | 0.0013 | 3.7511<br>×10 <sup>-4</sup> |    |              |        |        |                              |        |                             |                              |        |        |        |        |                             |
|      |      |              |                |                |                              |                |                             |                              |                |                |                                                                                                                                                                                                                                                   |                |                             |                                                                                                                                                                                                                                                                            |                |                             |    |              |        |        |                              |        |                             |                              |        |        |        |                             |        |                             |    |              |        |        |                              |        |                             |                              |        |        |        |        |                             | 40 | k=0.032<br>2 | 0.9760 | 0.0028 | k=0.007<br>8<br>n=1.388<br>4 | 0.9963 | 4.3090<br>×10 <sup>-4</sup> | a=1.058<br>5<br>k=0.033<br>8 | 0.9776 | 0.0026 | 0.9874 | 0.0015 | 5.4817<br>×10 <sup>-4</sup> |
|      |      |              |                |                |                              |                |                             |                              |                |                |                                                                                                                                                                                                                                                   |                |                             |                                                                                                                                                                                                                                                                            |                |                             |    |              |        |        |                              |        |                             |                              |        |        |        |                             |        |                             |    |              |        |        |                              |        |                             |                              |        |        |        |        |                             |    |              |        |        |                              |        |                             |                              |        |        |        |        |                             |

**Table S2.** Results of statistical analysis of the mathematical models at different relative humidity.

| T<br>°C | RH<br>% | Model          |                |                |                              |                |                             |                              |                |                |                                               |                |                             |                                                    |                |                             |
|---------|---------|----------------|----------------|----------------|------------------------------|----------------|-----------------------------|------------------------------|----------------|----------------|-----------------------------------------------|----------------|-----------------------------|----------------------------------------------------|----------------|-----------------------------|
|         |         | Lewis          |                |                | Page                         |                |                             | Henderson and Pabis          |                |                | Logarithmic                                   |                |                             | Wang and Singh                                     |                |                             |
|         |         | paramete<br>rs | R <sup>2</sup> | χ <sup>2</sup> | paramete<br>rs               | R <sup>2</sup> | χ <sup>2</sup>              | paramete<br>rs               | R <sup>2</sup> | χ <sup>2</sup> | paramete<br>rs                                | R <sup>2</sup> | χ <sup>2</sup>              | paramete<br>rs                                     | R <sup>2</sup> | χ <sup>2</sup>              |
| 40      |         | k=0.038<br>3   | 0.97540        | 0.0028         | k=0.008<br>6<br>n=1.428<br>9 | 0.9957         | 4.8913<br>×10 <sup>-4</sup> | a=1.054<br>5<br>k=0.040<br>0 | 0.97640        | 0.0027         | a=1.092<br>1<br>k=0.035<br>0<br>c=-<br>0.0514 | 0.9820         | 0.0020                      | a=-<br>0.0243<br>b=1.388<br>9<br>×10 <sup>-4</sup> | 0.9787         | 0.0024                      |
|         |         |                |                |                | k=0.006<br>7<br>n=1.437<br>7 |                |                             | a=1.066<br>2<br>k=0.034<br>5 |                |                | a=1.121<br>3<br>k=0.028<br>6<br>c=-<br>0.0757 |                |                             | a=-<br>0.0222<br>b=1.189<br>5<br>×10 <sup>-4</sup> |                |                             |
| 35      | 60      | k=0.029<br>5   | 0.97560        | 0.0028         | k=0.006<br>9<br>n=1.390<br>8 | 0.9977         | 2.7376<br>×10 <sup>-4</sup> | a=1.063<br>7<br>k=0.031<br>1 | 0.97810        | 0.0026         | a=1.132<br>4<br>k=0.024<br>8<br>c=-<br>0.0939 | 0.9887         | 0.0013                      | a=-<br>0.0206<br>b=1.049<br>8<br>×10 <sup>-4</sup> | 0.9968         | 3.7511×<br>10 <sup>-4</sup> |
|         |         |                |                |                | k=0.002<br>3<br>n=1.540<br>8 |                |                             | a=1.095<br>7<br>k=0.022<br>4 |                |                | a=1.409<br>0<br>k=0.012<br>2<br>c=-<br>0.3684 |                |                             | a=-<br>0.0146<br>b=5.068<br>5<br>×10 <sup>-4</sup> |                |                             |
| 80      |         | k=0.015<br>9   | 0.93400        | 0.0077         | k=0.001<br>1<br>n=1.637<br>2 | 0.9952         | 5.5207<br>×10 <sup>-4</sup> | a=1.110<br>8<br>k=0.017<br>8 | 0.94740        | 0.0061         | a=2.228<br>0<br>k=0.005<br>3<br>c=-<br>1.1918 | 0.9959         | 4.7206<br>×10 <sup>-4</sup> | a=-<br>0.0105<br>b=1.683<br>3<br>×10 <sup>-4</sup> | 0.9948         | 5.9872×<br>10 <sup>-4</sup> |
